# Supplementary material for: Encoding of facial features by single neurons in the human amygdala and hippocampus
Source: PubMed Central journal article supplement (PMC8671411; doi:10.1038/s42003-021-02917-1), 2021-12-14
Supplement: 42003_2021_2917_MOESM2_ESM.pdf [file 42003_2021_2917_MOESM2_ESM.pdf]

## Description of Additional Supplementary Files

**File name:** Supplementary Data 1

**Description:** Source data for generating Fig. 1

**File name:** Supplementary Data 2

**Description:** Source data for generating Fig. 2

**File name:** Supplementary Data 3

**Description:** Source data for generating Fig. 3

**File name:** Supplementary Data 4

**Description:** Source data for generating Fig. 4

**File name:** Supplementary Data 5

**Description:** Source data for generating Fig. 5

**File name:** Supplementary Data 6

**Description:** Source data for generating Fig. 6

**File name:** Supplementary Data 7

**Description:** Source data for generating Fig. 7

**File name:** Supplementary Data 8

**Description:** Source data for generating Fig. 8 and Supplementary Fig. 4.

**File name:** Supplementary Data 9

**Description:** Source data for generating Supplementary Fig. 1.

**File name:** Supplementary Data 10

**Description:** Source data for generating Supplementary Fig. 2.

**File name:** Supplementary Data 11

**Description:** Source data for generating Supplementary Fig. 3.
